# Supplementary material
Source: PubMed Central journal article supplement (PMC2576145)
Supplement: 90396.2008_1.pdf [file 90396.2008_1.pdf]

**Supplemental Figure 1.** Expression of WNK transcripts in *Xenopus laevis* oocytes. Amplification of the expected size band for each *Xenopus* WNK, which were 158 bp for WNK1, 198 bp for WNK2, 164 bp for WNK3, and 882 bp for WNK4, as stated.
